# Supplementary figures and images for: Dual Myostatin and Dystrophin Exon Skipping by Morpholino Nucleic Acid Oligomers Conjugated to a Cell-penetrating Peptide Is a Promising Therapeutic Strategy for the Treatment of Duchenne Muscular Dystrophy
Source: PubMed Central journal article supplement — Mol Ther Nucleic Acids. 2012 Dec 18;1(12):e62–. doi: 10.1038/mtna.2012.54 (PMC3528303; doi:10.1038/mtna.2012.54), 2012-12-18

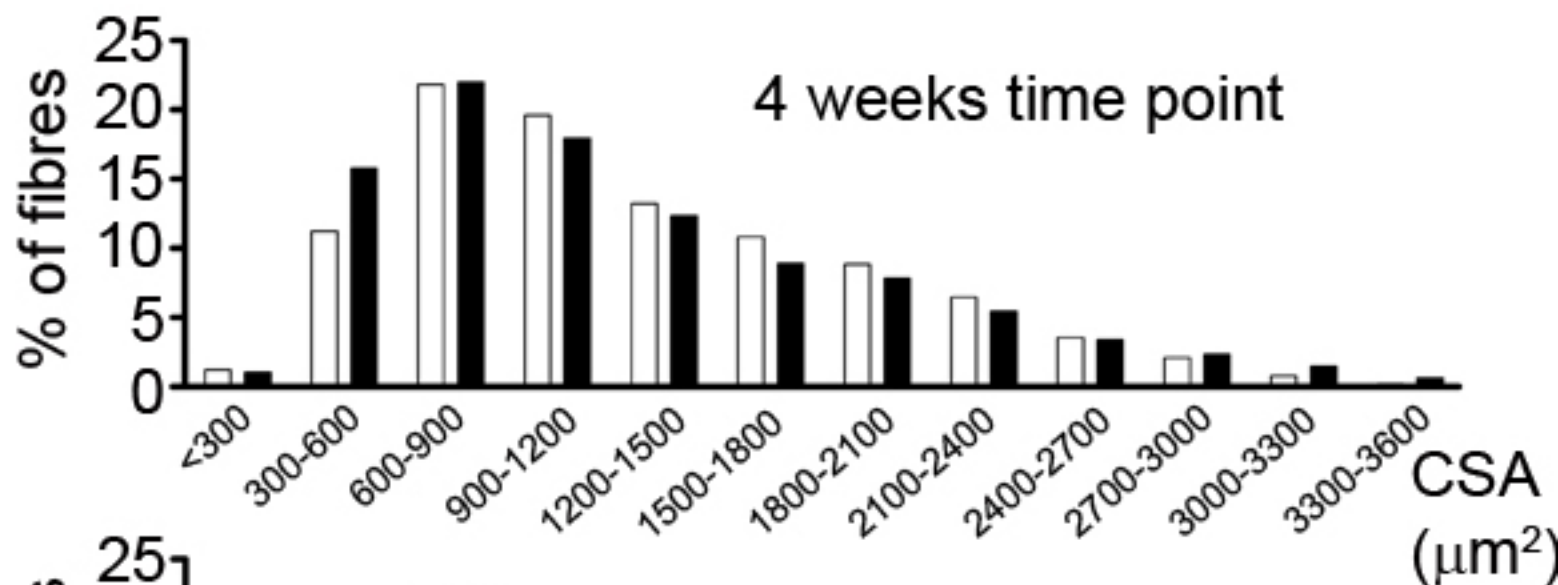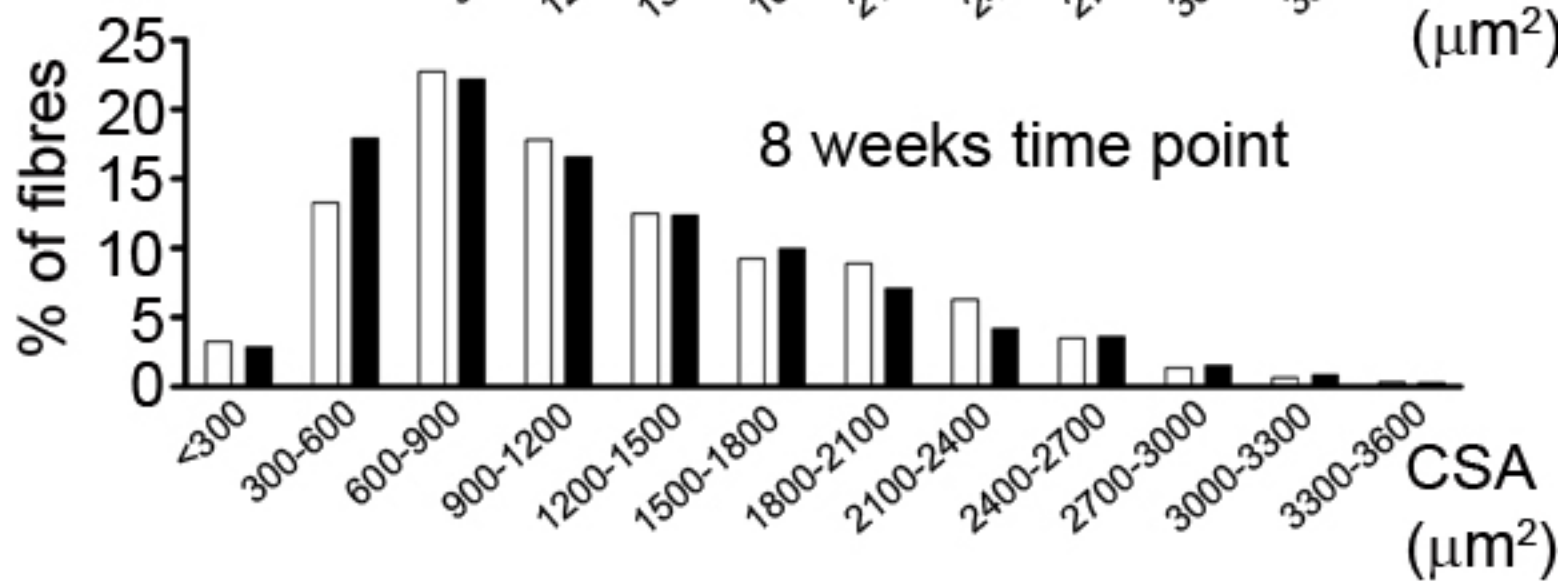

Supplement: mtna201254x1.pdf [file mtna201254x1.pdf]

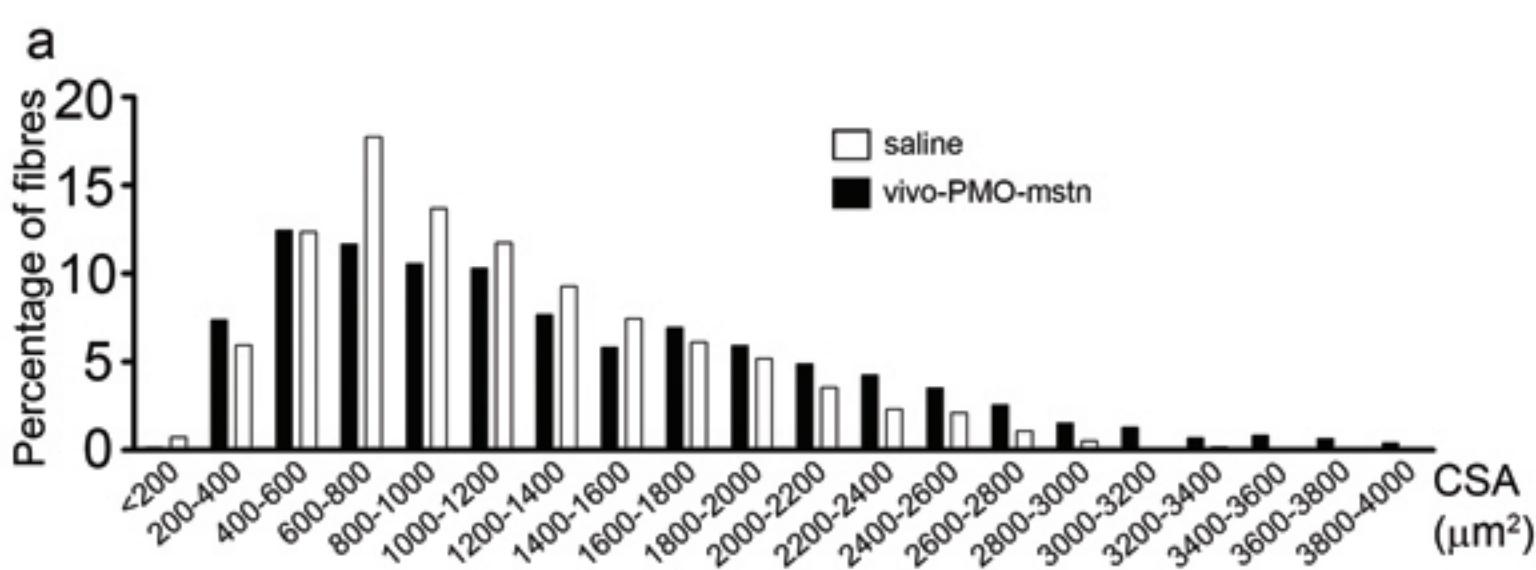

**b**

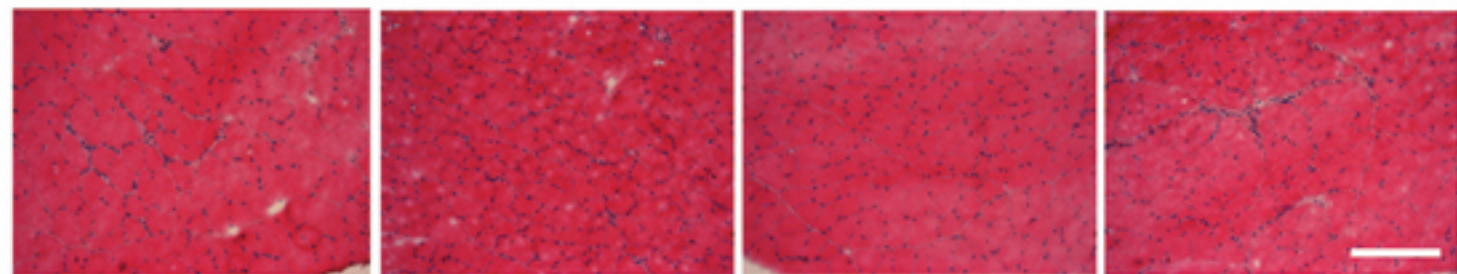

saline

PMO-mstn

vivo-PMO-mstn

B-PMO-mstn

Supplement: mtna201254x2.pdf [file mtna201254x2.pdf]

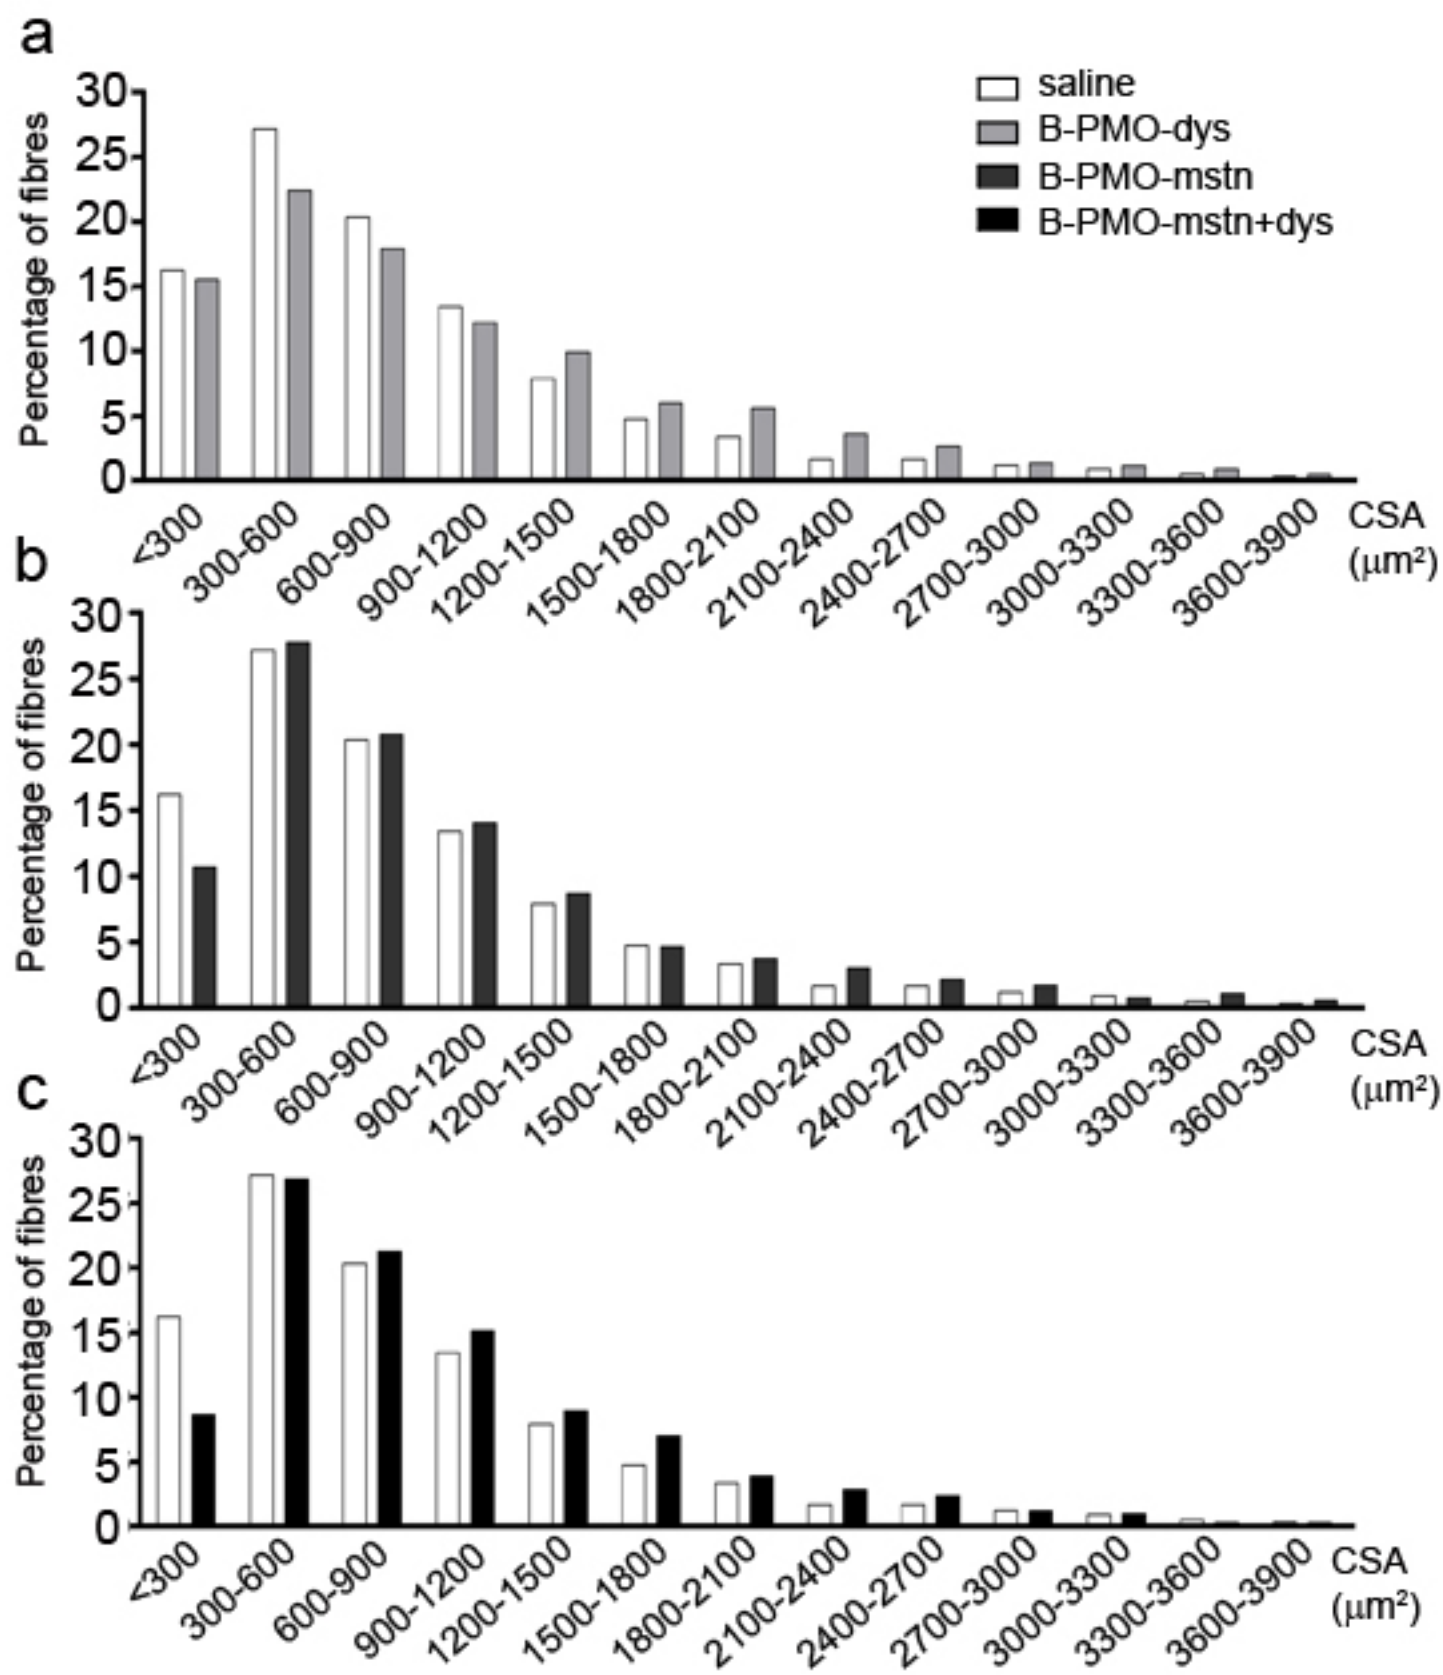

Supplement: mtna201254x3.pdf [file mtna201254x3.pdf]
